# Supplementary material for: Azaarene cis-dihydrodiol-derived 2,2′-bipyridine ligands for asymmetric allylic oxidation and cyclopropanation
Source: Royal Society of Chemistry journal article supplement (doi:10.1039/b814678k), 2008-01-01
Supplement: b814678k.pdf [file b814678k.pdf]

## Supplementary information

### Biotransformations of azaarene substrates 2A, 3A and 5A

**(7S,8R)-2-Chloro-7,8-dihydroquinoline-7,8-diol 2b:** A fermenter scale (100 litre) biotransformation of 2-chloroquinoline **2A** (75 g) was carried out, using *Pseudomonas putida* UV4, following our reported general procedure for this and other substrates.<sup>2b</sup> *cis*-(7S,8R)-2-Chloro-7,8-dihydroquinoline-7,8-diol **2b** (27 g, 30%) and *cis*-(5R,6S)-2-chloro-5,6-dihydroquinoline-5,6-diol **2c** (6 g, 8%) were obtained, after separation by column chromatography and further purification.<sup>2b</sup>

**(7S,8R)-2-Chloro-7,8-dihydro-3-methylquinoline-7,8-diol 3B and (5R,6S)-2-Chloro-5,6-dihydro-3-methylquinoline-5,6-diol 3C:** Biotransformation of 2-chloro-3-methylquinoline **3A** (10 g, 0.056 mol) by *Sphingomonas yanoikuyae* B8/36 was carried out, using the conditions reported earlier for 2-chloroquinoline **2A**.<sup>2b</sup> The aqueous culture medium was concentrated under reduced pressure (40 °C), extracted with EtOAc, dried (Na<sub>2</sub>SO<sub>4</sub>) and the solvent removal under reduced pressure. The residue was purified by flash chromatography (50% EtOAc/hexane) and the purified mixture of bioproducts obtained was separated by preparative PLC (5% MeOH/CHCl<sub>3</sub>) into two new metabolites, *cis*-(7S,8R)-2-chloro-7,8-dihydro-3-methylquinoline-7,8-diol **3B** (4.17 g, 35%) and *cis*-(5R,6S)-2-chloro-5,6-dihydro-3-methylquinoline-5,6-diol **3C** (2.98 g, 25%).

**(7S,8R)-2-Chloro-7,8-dihydro-3-methylquinoline-7,8-diol 3B:** Colourless crystalline solid; mp 114-116 °C (from EtOAc/hexane); [ $\alpha$ ]<sub>D</sub>+184 (*c* 1.01, MeOH); (Found: C, 56.6; H, 4.5; N, 6.6; C<sub>10</sub>H<sub>10</sub>ClNO<sub>2</sub> requires C, 56.75; H, 4.8; N, 6.6);  $\delta$ <sub>H</sub> (300 MHz, CDCl<sub>3</sub>) 2.36 (3 H, s, ArCH<sub>3</sub>), 4.45 (1 H, dd, *J*<sub>7,6</sub> 5.0, *J*<sub>7,8</sub> 5.0, H-7), 4.72 (1 H, d, *J*<sub>8,7</sub> 5.0, H-8), 6.27 (1 H, dd, *J*<sub>6,5</sub> 9.6, *J*<sub>6,7</sub> 5.0, H-6), 6.60 (1 H, d, *J*<sub>5,6</sub> 9.6, H-5), 7.31 (1 H, s, H-4);  $\delta$ <sub>C</sub> (125 MHz, CD<sub>3</sub>OD) 19.72, 69.58, 72.47, 126.57, 129.16, 133.35, 133.69, 138.90, 150.21, 155.49; *m/z* (EI) 211 (M<sup>+</sup>, <sup>35</sup>Cl, 28%), 213 (M<sup>+</sup>, <sup>37</sup>Cl, 10%), 182 (100), 164 (65), 193 (30), 154 (24), 128 (26), 102 (16);  $\nu$ <sub>max</sub> 3288.2 (O-H); CD (CH<sub>3</sub>CN)  $\Delta\epsilon$  -0.86 (308 nm),  $\Delta\epsilon$  -0.82 (301 nm),  $\Delta\epsilon$  +6.0 (250 nm),  $\Delta\epsilon$  +6.0 (218 nm),  $\Delta\epsilon$  -1.53 (203 nm).

**(5R,6S)-2-Chloro-5,6-dihydro-3-methylquinoline-5,6-diol 3C:** Colourless crystalline solid; mp 138-139 °C (from EtOAc/hexane); [ $\alpha$ ]<sub>D</sub>+172 (*c* 0.58, MeOH); (Found: C, 56.9; H, 4.8; N, 6.6; C<sub>10</sub>H<sub>10</sub>ClNO<sub>2</sub> requires C, 56.75; H, 4.8; N, 6.6);  $\delta$ <sub>H</sub> (300 MHz, CDCl<sub>3</sub>) 2.32 (3 H, s, ArCH<sub>3</sub>), 4.29 (1 H, dd, *J*<sub>6,5</sub> 5.0, *J*<sub>6,7</sub> 5.0, H-6), 4.69 (1 H, d, *J*<sub>5,6</sub> 5.0, H-5), 6.42 (1 H, dd, *J*<sub>7,6</sub> 5.0, *J*<sub>7,8</sub> 9.9, H-7), 6.57 (1 H, d, *J*<sub>8,7</sub> 9.9, H-8), 7.74 (1H, s, H-4);  $\delta$ <sub>C</sub> (125 MHz, CD<sub>3</sub>OD) 20.00, 68.05, 71.00, 129.54, 132.98, 134.13, 136.42, 140.20, 150.61, 151.51; *m/z* 211 (M<sup>+</sup>, <sup>35</sup>Cl, 15%), 213 (M<sup>+</sup>, <sup>37</sup>Cl, 5%), 193 (100), 182 (43), 156 (40), 130 (28), 103 (20);  $\nu$ <sub>max</sub> 3302.4 (O-H); CD: (CH<sub>3</sub>CN)  $\Delta\epsilon$  -2.0 (307 nm),  $\Delta\epsilon$  +6.4 (261 nm),  $\Delta\epsilon$  +10.1 (221 nm),  $\Delta\epsilon$  -5.5 (197 nm).

**(1S,2R)-3-(6-Chloro-pyridin-2-yl)cyclohexa-3,5-diene-1,2-diol 5B:** Biotransformation of 2-chloro-6-phenyl-pyridine **5A** (31 g, 0.16mol) was carried out using *Sphingomonas yanoikuyae* B8/36 under the reported conditions for other substrates.<sup>2b</sup> Ethyl acetate extraction and purification by column chromatography (5% MeOH:CHCl<sub>3</sub>) yielded (1S,2R)-3-(6-chloro-pyridin-2-yl)cyclohexa-3,5-diene-1,2-diol **5B** (5.0 g, 14% yield); colourless crystals, mp 108-110 °C (from EtOAc); [ $\alpha$ ]<sub>D</sub>+171 (*c* 0.52, CHCl<sub>3</sub>); (Found: C, 59.2; H,

4.5;N, 6.2 C<sub>11</sub>H<sub>10</sub>ClNO<sub>2</sub> requires C, 59.1; H, 4.5; N, 6.3);  $\delta_{\text{H}}$  (500 MHz; CDCl<sub>3</sub>) 4.58 (1 H, m, H-1), 4.82 (1 H, d,  $J_{2,1}$  6.4, H-2), 6.14 (2 H, m, H-6, H-5), 6.75 (1 H, d,  $J_{4,5}$  5.4, H-4), 7.19 (1H, d,  $J_{5',4'}$  7.9, H-5'), 7.51 (1 H, d,  $J_{3',4'}$  7.8, H-3'), 7.62 (1 H, t,  $J_{4',3'}$  7.5,  $J_{4',5'}$  7.5, H-4');  $\delta_{\text{C}}$  (125MHz; CDCl<sub>3</sub>) 67.98, 69.16, 118.56, 122.90, 124.20, 125.73, 134.04, 136.03, 139.65, 151.09, 157.98;  $m/z$  223 (M<sup>+</sup>, <sup>35</sup>Cl, 15%); CD:  $\Delta\epsilon$  +6.99 (323nm),  $\Delta\epsilon$  -11.37 (219nm).

### Partial hydrogenations of *cis*-dihydrodiols **2B**, **3B** and **5B**

A solution of **2B**, **3B** or **5B** (5-10 mmol) in EtOAc (*ca.* 25 cm<sup>3</sup>) was stirred at ambient temperature, under an atmosphere of hydrogen (6 h, 4 bar), in the presence of PtO<sub>2</sub> catalyst (8 mol %). The catalyst was filtered off and the filtrate concentrated to give the crude hydrogenated product. Purification by column chromatography afforded the pure hydrogenated products **2D** or **3D** (40% EtOAc/hexane) or **5D** (5% MeOH/CHCl<sub>3</sub>).

**(7S,8R)-2-Chloro-5,6,7,8-tetrahydroquinoline-7,8-diol 2D**: Low melting solid (1.98 g, 99%);  $[\alpha]_{\text{D}}^{+74}$  (*c* 0.5, CHCl<sub>3</sub>); (Found: M<sup>+</sup> 199.0390, C<sub>9</sub>H<sub>10</sub>ClNO<sub>2</sub> requires 199.0400);  $\delta_{\text{H}}$  (300 MHz, CDCl<sub>3</sub>) 1.89 (1 H, m, H-6), 2.21 (1 H, m, H-6'), 2.69 (1 H, ddd,  $J_{5,6}$  3.2,  $J_{5,6}$  6.5,  $J_{5,5'}$  17.2, H-5), 3.04 (1 H, ddd,  $J_{5',6}$  6.5,  $J_{5',6'}$  11.3,  $J_{5',5}$  17.2, H-5'), 4.34 (1 H, m, H-7), 4.62 (1 H, d,  $J_{8,7}$  3.3, H-8), 7.17 (1 H, d,  $J_{3,4}$  8.0, H-3), 7.41 (1 H, d,  $J_{4,3}$  8.0, H-4);  $\delta_{\text{C}}$  (125 MHz, CDCl<sub>3</sub>) 23.42, 25.69, 66.92, 70.73, 123.60, 130.59, 139.78, 149.03, 156.36;  $m/z$  199 (M<sup>+</sup>, <sup>35</sup>Cl, 15%), 127 (100).

**(7S,8R)-2-Chloro-3-methyl-5,6,7,8-tetrahydroquinoline-7,8-diol 3D**: White solid (0.97 g, 96%); mp 134 °C (from EtOAc/hexane);  $[\alpha]_{\text{D}}^{-21}$  (*c* 0.91, CHCl<sub>3</sub>); (Found: M<sup>+</sup> 213.0555, C<sub>10</sub>H<sub>12</sub>ClNO<sub>2</sub> requires 213.0557);  $\delta_{\text{H}}$  (300 MHz, CDCl<sub>3</sub>) 1.90 (1 H, m, H-6), 2.21 (1 H, m, H-6'), 2.34 (3 H, s, ArCH<sub>3</sub>), 2.68 (1 H, ddd,  $J_{5,6}$  3.3,  $J_{5,6}$  6.5,  $J_{5,5'}$  17.2, H-5), 3.05 (1 H, ddd,  $J_{5',6}$  6.5,  $J_{5',6'}$  10.8,  $J_{5',5}$  17.2, H-5'), 4.32 (1 H, m, H-7), 4.61 (1 H, d,  $J_{8,7}$  2.8, H-8), 7.32 (1 H, s, H-4);  $\delta_{\text{C}}$  (125 MHz, CDCl<sub>3</sub>) 19.56, 23.31, 25.73, 67.04, 70.49, 130.69, 131.75, 140.36, 149.16, 153.60;  $m/z$  213 (M<sup>+</sup>, <sup>35</sup>Cl, 6%), 215 (M<sup>+</sup>, <sup>37</sup>Cl, 2%), 141 (100), 184 (68), 166 (70), 130(18), 105 (29), 91 (8), 77 (25).

**(1S,2R)-3-(6-Chloro-pyridin-2-yl)cyclohex-3-ene-1,2-diol 5D**: White solid (0.5 g, 99%); mp 92-94 °C;  $[\alpha]_{\text{D}}^{-14}$  (*c* 0.4, CHCl<sub>3</sub>); (Found; M<sup>+</sup> 225.0566, C<sub>11</sub>H<sub>12</sub>ClNO<sub>2</sub> requires 225.0557);  $\delta_{\text{H}}$  (500 MHz; CDCl<sub>3</sub>) 1.81 (1 H, m, H-6a), 1.92 (1 H, m, H-6b), 2.28 (1 H, m, H-5a), 2.51 (1 H, m, H-5b), 3.94 (1 H, m, H-1), 4.72 (1 H, d,  $J_{2,1}$  4.0, H-2), 6.67 (1 H, m, H-4), 7.19 (1 H, d,  $J_{5',4'}$  7.80, H-5'), 7.45 (1 H, d,  $J_{3',4'}$  7.83, H-3'), 7.62 (1 H, t,  $J$  7.80, H-4');  $\delta_{\text{C}}$  (125 MHz; CDCl<sub>3</sub>) 24.74, 25.86, 67.33, 68.92, 118.31, 122.60, 133.34, 136.11, 139.62, 150.60, 159.16;  $m/z$  225 (M<sup>+</sup>, <sup>35</sup>Cl, 17%), 154 (100).

### Synthesis of acetals **2E**, **3E** and **5E-8E**

(a) *cis*-Tetrahydrodiol **2D** or **3D** (5 mmol) were dissolved in a mixture of acetone (10 cm<sup>3</sup>) and 2,2'-dimethoxypropane (DMP) (10 cm<sup>3</sup>). To this solution, a catalytic amount of trifluoroacetic acid (0.2 cm<sup>3</sup>) was added at 0 °C. The reaction mixture was left stirring at ice temperature for 20 min and then at room temperature until the starting material had reacted completely (*ca.* 4 h, TLC analysis). The solvent was removed under reduced pressure, the residue extracted with EtOAc, the extract dried (Na<sub>2</sub>SO<sub>4</sub>), concentrated and the residue purified by flash chromatography (20% EtOAc/hexane) to yield acetonide **2E** or **3E**.

(b) A mixture of *cis*-diol **5D** or **6D** or **7D** or **8D** (1 mmol), *p*-toluenesulfonic acid monohydrate (0.050 g, 0.26 mmol), appropriate ketone (2.5 equiv.) in benzene (25cm<sup>3</sup>) was heated at reflux in a Dean-Stark trap for 20 h. The reaction mixture was allowed to

cool to room temperature, a saturated aqueous solution of Na<sub>2</sub>CO<sub>3</sub> (5 cm<sup>3</sup>) was added and the mixture extracted with EtOAc. The extract was dried (Na<sub>2</sub>SO<sub>4</sub>), the solvent removed under reduce pressure, and the crude acetal purified by column chromatography (20% EtOAc/hexane) to give pure samples of acetal **5E-8E**.

**(3aS,9bR)-8-Chloro-2,2-dimethyl-3a,4,5,9b-tetrahydro-[1,3]dioxolo[4,5h]quinoline**

**2E**: Colourless crystalline solid (0.97 g, 81%); mp 48 °C (from EtOAc/hexane); [ $\alpha$ ]<sub>D</sub> +164 (*c* 0.8, CHCl<sub>3</sub>); (Found: M<sup>+</sup> 239.0715, C<sub>12</sub>H<sub>14</sub>ClNO<sub>2</sub> requires 239.0713);  $\delta$ <sub>H</sub> (500 MHz, CDCl<sub>3</sub>) 1.37 (3 H, s, CH<sub>3</sub>), 1.45 (3 H, s, CH<sub>3</sub>), 1.75 (1 H, m, H-4), 2.14 (1 H, m, H-4'), 2.53 (1 H, ddd, *J*<sub>5,4'</sub> 4.4, *J*<sub>5,4</sub> 4.4, *J*<sub>5,5'</sub> 15.6, H-5), 2.89 (1 H, ddd, *J*<sub>5,4'</sub> 3.5, *J*<sub>5,4'</sub> 11.4, *J*<sub>5,5'</sub> 15.6, H-5'), 4.66 (1 H, m, H-3a), 5.14 (1 H, d, *J*<sub>9b,3a</sub> 7.0, H-9b), 7.19 (1 H, d, *J*<sub>7,6</sub> 8.0, H-7), 7.41 (1 H, d, *J*<sub>6,7</sub> 8.0, H-6);  $\delta$ <sub>C</sub> (125 MHz, CDCl<sub>3</sub>) 23.28, 24.70, 26.83, 27.74, 73.45, 75.33, 108.74, 123.76, 132.85, 139.12, 149.37, 154.33; *m/z* 239 (M<sup>+</sup>, <sup>35</sup>Cl, 31%), 117 (100).

**(3aS,9bR)-8-Chloro-3a,4,5,9b-tetrahydro-2,2,7-trimethyl-[1,3]dioxolo[4,5h]quinoline**

**3E**: Colourless crystalline solid (0.2 g, 87%); mp 68-69 °C (from hexane); [ $\alpha$ ]<sub>D</sub> +139 (*c* 0.52, CHCl<sub>3</sub>); (Found: MH<sup>+</sup> 254.0944, C<sub>13</sub>H<sub>17</sub>ClNO<sub>2</sub> requires 254.0942);  $\delta$ <sub>H</sub> (300 MHz, CDCl<sub>3</sub>) 1.29 (3 H, s, CH<sub>3</sub>), 1.37 (3 H, s, CH<sub>3</sub>), 1.66 (1 H, m, H-4), 2.03 (1 H, m, H-4'), 2.26 (3 H, s, ArCH<sub>3</sub>), 2.44 (1 H, ddd, *J*<sub>5,4'</sub> 4.4, *J*<sub>5,4</sub> 4.4, *J*<sub>5,5'</sub> 15.5, H-5), 2.89 (1 H, ddd, *J*<sub>5,4'</sub> 4.0, *J*<sub>5,4'</sub> 11.4, *J*<sub>5,5'</sub> 15.5, H-5'), 4.58 (1 H, m, H-3a), 5.04 (1 H, d, *J*<sub>9b,3a</sub> 6.7, H-9b), 7.25 (1 H, s, H-6);  $\delta$ <sub>C</sub> (125 MHz, CDCl<sub>3</sub>) 19.58, 23.50, 25.28, 27.24, 28.13, 74.24, 75.66, 108.96, 132.28, 133.35, 139.94, 149.91, 152.04; *m/z* 254 (MH<sup>+</sup>, <sup>35</sup>Cl, 100%), 256 (M<sup>++</sup>H, <sup>37</sup>Cl, 38%), 220 (20), 196 (6), 180 (9), 238 (4), 146 (52), 58 (8).

5

**2-Chloro-6-[(3aR,7aS)-2,2-diethyl-3a,6,7,7a-tetrahydro-benzo[1,3]dioxol-4-yl]pyridine**

**5E**: (Using pentan-2-one) colourless oil; [ $\alpha$ ]<sub>D</sub> +60 (*c* 0.9, CHCl<sub>3</sub>); (Found: MH<sup>+</sup> 294.1255, C<sub>16</sub>H<sub>20</sub>ClNO<sub>2</sub> requires 294.1260);  $\delta$ <sub>H</sub> (500 MHz; CDCl<sub>3</sub>) 0.78 (3 H, t, *J* 7.5, CH<sub>3</sub>), 0.95 (3 H, t, *J* 7.5, CH<sub>3</sub>), 1.62 (2 H, m, CH<sub>2</sub>), 1.72 (2 H, m, CH<sub>2</sub>), 1.79 (1 H, m, H-7), 2.05 (1 H, m, H-7'), 2.18 (1 H, m, H-6), 2.44 (1 H, m, H-6'), 4.51 (1 H, dt, *J*<sub>7a,3a</sub> 5.6, *J*<sub>7a,7'</sub> 3.2, *J*<sub>7a,7'</sub> 3.2, H-7a), 5.01 (1 H, d, *J*<sub>3a,7a</sub> 5.9, H-3a), 7.07 (1 H, dd, *J*<sub>5,6</sub> 3.3, *J*<sub>5,6'</sub> 5.5, H-5), 7.17 (1 H, d, *J*<sub>5,4'</sub> 7.8, H-5'), 7.49 (1 H, d, *J*<sub>3',4'</sub> 7.7 H-3'), 7.61 (1 H, t, *J* 7.8, H-4');  $\delta$ <sub>C</sub> (125 MHz; CDCl<sub>3</sub>) 8.42, 9.06, 21.48, 26.01, 30.26, 30.47, 72.28, 74.01, 112.84, 119.25, 122.64, 133.83, 134.74, 139.56, 151.08, 157.87; *m/z* 294 (MH<sup>+</sup>, <sup>35</sup>Cl, 35%), 190 (45).

**(3aS,9bR)-8-Chloro-2,2-diethyl-3a,4,5,9b-tetrahydro-[1,3]-dioxolo[4,5h]quinoline**

**6E**: (With pentan-2-one) white crystalline solid (0.16 g, 60%); mp 37 °C (from EtOAc/hexane); [ $\alpha$ ]<sub>D</sub> +170 (*c* 0.98, CHCl<sub>3</sub>); (Found; MH<sup>+</sup> 268.1106, C<sub>14</sub>H<sub>19</sub>O<sub>2</sub>N<sub>35</sub>Cl requires 268.1104);  $\delta$ <sub>H</sub> (300 MHz, CDCl<sub>3</sub>) 0.72 (3 H, t, *J* 7.5, CH<sub>2</sub>CH<sub>3</sub>), 0.96 (3 H, t, *J* 7.5, CH<sub>2</sub>CH<sub>3</sub>), 1.59 (2 H, q, *J* 7.3, CH<sub>2</sub>CH<sub>3</sub>), 1.72-1.80 (3 H, m, CH<sub>2</sub>CH<sub>3</sub>, H-4), 2.24 (1 H, m, H-4'), 2.55 (1 H, ddd, *J*<sub>5,4'</sub> 3.9, *J*<sub>5,4</sub> 3.9, *J*<sub>5,5'</sub> 15.6, H-5), 2.99 (1 H, ddd, *J*<sub>5,4'</sub> 3.9, *J*<sub>5,4'</sub> 12.6, *J*<sub>5,5'</sub> 15.6, H-5'), 4.70 (1 H, m, H-3a), 5.14 (1 H, d, *J*<sub>9b,3a</sub> 6.9, H-9b), 7.19 (1 H, d, *J*<sub>7,6</sub> 8.0, H-7), 7.42 (1 H, d, *J*<sub>6,7</sub> 8.0, H-6);  $\delta$ <sub>C</sub> (125 MHz; CDCl<sub>3</sub>) 14.61, 21.46, 25.81, 26.43, 59.06, 60.79, 68.57, 77.60, 80.01, 124.19, 131.30, 140.08, 148.89, 155.12; *m/z* 268 (MH<sup>+</sup>, 100 %).

**(3aS,9bR)-8-Chloro-3a,4,5,9b-tetrahydrospiro{[1,3]dioxolo[4,5h]quinoline-2,1'-cyclohexane}**

**7E**: (With cyclohexanone) white crystalline solid (0.2 g, 72%); mp 88-89 °C (from EtOAc/hexane); [ $\alpha$ ]<sub>D</sub> +124 (*c* 1.2, CHCl<sub>3</sub>); (Found: M<sup>+</sup> 279.1049, C<sub>15</sub>H<sub>18</sub>ClNO<sub>2</sub> requires 279.1026);  $\delta$ <sub>H</sub> (300 MHz, CDCl<sub>3</sub>) 1.26-1.61 (11 H, m, (CH<sub>2</sub>)<sub>5</sub>, H-4), 2.05 (1 H, m, H-4'), 2.53 (1 H, ddd, *J*<sub>5,4'</sub> 4.2, *J*<sub>5,4</sub> 4.2, *J*<sub>5,5'</sub> 15.9, H-5), 2.94 (1 H, ddd, *J*<sub>5,4'</sub> 3.9, *J*<sub>5,4'</sub>

12.0,  $J_{5',5}$  15.9, H-5'), 4.66 (1 H, m, H-3a), 5.13 (1 H, d,  $J_{9b,3a}$  6.6, H-9b), 7.18 (1 H, d,  $J_{7,6}$  8.1, H-7), 7.42 (1 H, d,  $J_{6,7}$  8.1, H-6);  $\delta_c$  (125 MHz, CDCl<sub>3</sub>) 23.64, 24.07, 24.40, 25.56, 28.37, 34.51, 36.90, 73.41, 75.51, 109.60, 124.01, 133.38, 139.39, 149.61, 155.03;  $m/z$  279 (M<sup>+</sup>, <sup>35</sup>Cl, 43%), 281 (M<sup>+</sup>, <sup>37</sup>Cl, 16%), 236 (100), 182 (88), 128 (38), 117 (10), 55 (13).

**(2*S*,3*aS*,9*bR*)-2-*tert*-Butyl-8-chloro-3*a*,4,5,9*b*-tetrahydro-2-methyl-[1,3]-dioxolo[4,5*h*]quinoline 8E:** (With *t*-butylmethyl ketone) acetal **8E** was obtained as a 9:1 mixture of diastereoisomers. The major diastereoisomer **8E** was separated by multi-elution PLC (6% EtOAc/hexane) or by partial crystallization. White crystalline solid (0.19 g, 70%); mp 134 °C (from EtOAc/hexane);  $[\alpha]_D^{+159}$  (*c* 1.0, CHCl<sub>3</sub>); (Found: C, 64.1; H, 7.4; N, 4.85; C<sub>15</sub>H<sub>20</sub>ClNO<sub>2</sub> requires C, 63.9; H, 7.15; N, 5.0);  $\delta_H$  (300 MHz, CDCl<sub>3</sub>) 0.86 (9 H, s, CMe<sub>3</sub>), 1.38 (3 H, s, CH<sub>3</sub>), 1.76 (1 H, m, H-4), 2.29 (1 H, m, H-4'), 2.51 (1 H, ddd,  $J_{5,4'}$  3.5,  $J_{5,4}$  3.5,  $J_{5,5'}$  16.0, H-5), 2.98 (1 H, ddd,  $J_{5',4}$  3.7,  $J_{5',4'}$  12.6,  $J_{5',5}$  16.0, H-5'), 4.73 (1 H, m, H-3a), 5.14 (1 H, d,  $J_{9b,3a}$  7.0, H-9b), 7.17 (1 H, d,  $J_{7,6}$  8.0, H-7), 7.39 (1 H, d,  $J_{6,7}$  8.0, H-6);  $\delta_c$  (125 MHz, CDCl<sub>3</sub>) 18.08, 23.49, 25.59, 27.73, 38.42, 72.99, 75.42, 113.81, 123.74, 132.76, 139.35, 149.62, 155.05;  $m/z$  224 [M<sup>+</sup>-C(CH<sub>3</sub>)<sub>3</sub>, <sup>35</sup>Cl, 56%], 226 [M<sup>+</sup>-C(CH<sub>3</sub>)<sub>3</sub>, <sup>37</sup>Cl, 18%], 182 (100), 128 (10), 117 (4).

The minor diastereoisomer **8E'** was only identified by NMR spectroscopy:  $\delta_H$  (300 MHz; CDCl<sub>3</sub>) 1.01 (9 H, s, C(CH<sub>3</sub>)<sub>3</sub>), 1.04 (3 H, s, CH<sub>3</sub>), 1.80 (1 H, m, H-4), 2.30 (1 H, m, H-4'), 2.56 (1 H, ddd,  $J_{5,4'}$  3.5,  $J_{5,4}$  3.5,  $J_{5,5'}$  16.0, H-5), 3.03 (1 H, ddd,  $J_{5',4}$  3.9,  $J_{5',4'}$  12.7,  $J_{5',5}$  16.0, H-5'), 4.68 (1 H, m, H-3a), 5.15 (1 H, d,  $J_{9b,3a}$  6.3, H-9b), 7.18 (1 H, d,  $J_{7,6}$  8.0, H-7), 7.40 (1 H, d,  $J_{6,7}$  8.0, H-6);  $\delta_c$  (125 MHz, CDCl<sub>3</sub>) 22.59, 23.15, 26.00, 27.46, 40.89, 75.94, 115.89, 123.84, 132.22, 139.49, 149.97, 156.17.

#### Homocoupling of acetals **2E**, **3E**, **5E** and **6E-8E**

Zinc powder (0.34 g, 5.2 mmol) was added to a stirred solution of nickel (II) chloride hexahydrate (0.5 g, 2.1 mmol) and PPh<sub>3</sub> (1.82 g, 6.9 mmol) in dry degassed DMF (10 cm<sup>3</sup>). The reaction mixture was heated at 60 °C until the colour of the solution changed to red (*ca.* 1 h). A solution of appropriate acetal (1.7 mmol), in dry degassed DMF (10 cm<sup>3</sup>), was then added and the reaction mixture heated at 60 °C for 5 h, allowed to cool to room temperature and poured into an aqueous solution of NH<sub>4</sub>OH (10% w/w, 20 cm<sup>3</sup>). The resultant mixture was extracted with CH<sub>2</sub>Cl<sub>2</sub>, the extract washed with brine, dried (Na<sub>2</sub>SO<sub>4</sub>), and the solution concentrated to afford the crude product. Purification by column chromatography (50% EtOAc/hexane) gave a pure sample of the corresponding 2,2'-bipyridine.

**(3*aS*,9*bR*,3*a'S*,9*b'R*)-2,2,2',2'-Tetramethyl-3*a*,4,5,9*b*,3*a'*,4',5',9*b'*-octahydro-(8,8')-bi([1,3]-dioxolo[4,5*h*]quinolinyl) 2F:** White crystalline solid (0.31 g, 89%); mp 233 °C (from EtOAc/hexane);  $[\alpha]_D^{+273}$  (*c* 1.0, CHCl<sub>3</sub>); (Found: C, 70.7; H, 6.9; N, 6.7 C<sub>24</sub>H<sub>28</sub>N<sub>2</sub>O<sub>4</sub> requires C, 70.6; H, 6.9; N, 6.9);  $\delta_H$  (300 MHz, CDCl<sub>3</sub>) 1.39 (6 H, s, 2 x CH<sub>3</sub>), 1.50 (6 H, s, 2 x CH<sub>3</sub>), 1.75 (2 H, m, H-4, H-4'), 2.21 (2 H, m, H-4'', H-4'''), 2.63 (2 H, ddd,  $J_{5,4''}$  4.0,  $J_{5,4}$  4.0,  $J_{5,5''}$  15.6, H-5, H-5'), 3.04 (2 H, ddd,  $J_{5'',4}$  3.5,  $J_{5'',4''}$  11.9,  $J_{5'',5}$  15.6, H-5'', H-5'''), 4.77 (2 H, m, H-3a, H-3a'), 5.32 (2 H, d,  $J_{9b,3a}$  6.8, H-9b, H-9b'), 7.59 (2 H, d,  $J_{6,7}$  8.0, H-6, H-6'), 8.42 (2 H, d,  $J_{7,6}$  8.0, H-7, H-7');  $\delta_c$  (125 MHz; CDCl<sub>3</sub>) 23.82, 24.73, 26.77, 28.39, 73.87, 76.56, 108.28, 120.78, 134.25, 136.86, 152.91, 154.64;  $m/z$  408 (M<sup>+</sup>, <sup>35</sup>Cl, 16%), 293 (100).

**(3*aS*,9*bR*,3*a'S*,9*b'R*)-2,2,7,2',2',7'-Hexamethyl-3*a*,4,5,9*b*,3*a'*,4',5',9*b'*-octahydro-(8,8')-bi([1,3]-dioxolo[4,5*h*]quinolinyl) 3F:** White crystalline solid (0.12 g, 34 %); mp 160-162 °C (from hexane);  $[\alpha]_D^{+241}$  (*c* 1.1, CHCl<sub>3</sub>); (Found: MH<sup>+</sup>, 437.2440, C<sub>26</sub>H<sub>33</sub>N<sub>2</sub>O<sub>4</sub> requires 437.2435);  $\delta_H$  (300 MHz, CDCl<sub>3</sub>) 1.37 (6 H, s, 2 x CH<sub>3</sub>), 1.42 (6 H,

s, 2 x CH<sub>3</sub>), 1.75 (2 H, m, H-4, H-4'), 2.15 (8 H, m, 2 x ArCH<sub>3</sub>, H-4'', H-4'''), 2.56 (2 H, ddd, *J*<sub>5,4''</sub> 4.0, *J*<sub>5,4</sub> 4.0, *J*<sub>5,5''</sub> 15.4, H-5, H-5'), 2.96 (2 H, ddd, *J*<sub>5'',4</sub> 3.7, *J*<sub>5'',4''</sub> 12.6, *J*<sub>5'',5</sub> 15.4, H-5'', H-5'''), 4.67 (2 H, m, H-3a, H-3a'), 5.21 (2 H, d, *J*<sub>9b,3a</sub> 6.8, H-9b, H-9b'), 7.46 (2 H, s, H-6, H-6');  $\delta_c$  (125 MHz, CDCl<sub>3</sub>) 18.84, 24.36, 25.28, 26.96, 28.80, 73.70, 74.47, 108.79, 131.93, 133.77, 138.67, 150.93, 156.60; *m/z* 436 (M<sup>+</sup>, 44%), 361 (100), 321 (31), 303 (48), 287 (22), 275 (15), 59 (42).

**6,6'-bis-((3a*R*,7a*S*)-2,2-Diethyl-3a,6,7,7a-tetrahydro-benzo[1,3]dioxol-4-yl)-[2,2']bipyridinyl 5F:** Colourless oil (0.25 g, 66 % yield); [ $\alpha$ ]<sub>D</sub>+80 (*c* 0.1, CHCl<sub>3</sub>); (Found: MH+517.3064, C<sub>32</sub>H<sub>40</sub>N<sub>2</sub>O<sub>4</sub> requires 517.3066);  $\delta_H$  (500 MHz, CDCl<sub>3</sub>) 0.81 (3 H, t, *J* 7.5, CH<sub>3</sub>), 0.98 (3 H, t, *J* 7.5, CH<sub>3</sub>), 1.65 (2 H, m, CH<sub>2</sub>), 1.75 (2 H, q, *J* 7.5, CH<sub>2</sub>), 1.85 (1 H, m, H-7), 2.05 (1 H, m, H-7'), 2.22 (1 H, m, H-6), 2.50 (1 H, m, H-6''), 4.51 (1 H, dt, *J*<sub>7a,3a</sub> 5.9, *J*<sub>7a,7</sub> 3.4, *J*<sub>7a,7'</sub> 3.4, H-7a), 5.24 (1 H, d, *J*<sub>3a,7a</sub> 5.9, H-3a), 7.14 (1 H, dd, *J*<sub>5,6</sub> 3.6, *J*<sub>5,6''</sub> 5.2, H-5), 7.57 (1 H, d, *J*<sub>5',4'</sub> 7.8, H-5'), 7.76 (1 H, t, *J* 7.8, H-4'), 8.37 (1 H, d, *J*<sub>3',4'</sub> 7.8, H-3');  $\delta_c$  (125 MHz, CDCl<sub>3</sub>) 8.49, 9.13, 21.87, 26.36, 30.21, 30.55, 72.25, 74.05, 112.64, 119.68, 120.72, 132.13, 136.05, 137.68, 155.80, 156.08; *m/z* 517 (MH<sup>+</sup>, 100%).

**(3a*S*,9b*R*,3a'*S*,9b'*R*)-2,2,2',2'-Tetraethyl-3a,4,5,9b,3a',4',5',9b'-octahydro-[8,8']bi-[[1,3]-dioxolo[4,5*h*]quinolinyl) 6F:** White crystalline compound (0.38 g, 96%); mp 187-189 °C (from EtOAc/hexane); [ $\alpha$ ]<sub>D</sub>+281 (*c* 1.0, CHCl<sub>3</sub>); (Found: M<sup>+</sup> 464.2667 C<sub>28</sub>H<sub>36</sub>O<sub>4</sub>N<sub>2</sub> requires 464.2675);  $\delta_H$  (300 MHz, CDCl<sub>3</sub>) 0.76 (6 H, t, *J* 7.5, 2 x CH<sub>2</sub>CH<sub>3</sub>), 1.02 (6 H, t, *J* 7.5, 2 x CH<sub>2</sub>CH<sub>3</sub>), 1.62 (4 H, q, *J* 7.3, 2 x CH<sub>2</sub>CH<sub>3</sub>), 1.67-1.83 (6 H, m, 2 x CH<sub>2</sub>CH<sub>3</sub>, H-4, H-4'), 2.31 (4 H, m, H-4'', H-4'''), 2.62 (2 H, ddd, *J*<sub>5,4''</sub> 3.7, *J*<sub>5,4</sub> 3.7, *J*<sub>5,5''</sub> 15.6, H-5, H-5'), 3.11 (2 H, ddd, *J*<sub>5'',4</sub> 3.6, *J*<sub>5'',4''</sub> 12.6, *J*<sub>5'',5</sub> 15.6, H-5'', H-5'''), 4.77 (2 H, m, H-3a, H-3a'), 5.32 (2 H, d, *J*<sub>9b,3a</sub> 6.6, H-9b, H-9b'), 7.56 (2 H, d, *J*<sub>6,7</sub> 7.8, H-6, H-6'), 8.40 (2 H, d, *J*<sub>7,6</sub> 7.8, H-7, H-7');  $\delta_c$  (125 MHz, CDCl<sub>3</sub>) 14.61, 21.46, 25.81, 26.43, 59.06, 60.79, 68.57, 77.60, 80.01, 124.19, 131.

**(3a*S*,9b*R*,3a'*S*,9b'*R*)-8,8'-bis-(Spiro[1,3]dioxolo[4,5*h*]quinoline-2,1'-cyclohexane) 7F:** White crystalline solid (0.29 g, 68%); mp 245-247 °C (from EtOAc/hexane); [ $\alpha$ ]<sub>D</sub>+246 (*c* 0.55, CHCl<sub>3</sub>); (Found: C, 73.45; H, 7.5; N, 5.5; C<sub>30</sub>H<sub>36</sub>N<sub>2</sub>O<sub>4</sub> requires C, 73.7; H, 7.4; N, 5.7);  $\delta_H$  (300 MHz, CDCl<sub>3</sub>) 1.53-1.78 [22 H, m, 2 x (CH<sub>2</sub>)<sub>5</sub>, H-4, H-4'], 2.21 (2 H, m, H-4'', H-4'''), 2.63 (2 H, ddd, *J*<sub>5,4''</sub> 4.0, *J*<sub>5,4</sub> 4.0, *J*<sub>5,5''</sub> 15.6, H-5, H-5'), 3.04 (2 H, ddd, *J*<sub>5'',4</sub> 3.6, *J*<sub>5'',4''</sub> 12.0, *J*<sub>5'',5</sub> 15.6, H-5'', H-5'''), 4.74 (2 H, m, H-3a, H-3a'), 5.32 (2 H, d, *J*<sub>9b,3a</sub> 6.6, H-9b, H-9b'), 7.57 (2 H, d, *J*<sub>6,7</sub> 8.1, H-6, H-6'), 8.37 (2 H, d, *J*<sub>7,6</sub> 8.1, H-7, H-7');  $\delta_c$  (125 MHz, CDCl<sub>3</sub>) 24.47, 25.68, 28.81, 32.28, 35.06, 36.79, 73.94, 76.82, 109.35, 121.50, 134.86, 137.47, 153.78, 155.17; *m/z* 488 (M<sup>+</sup>, 49%), 445 (36), 391 (47), 375 (94), 347 (14), 293 (100), 277 (47), 201 (7), 149 (28).

**(2*S*,3a*S*,9b*R*,2'*S*,3a'*S*,9b'*R*)-2,2'-di-*tert*-Butyl-3a,4,5,9b,3a',4',5',9b'-octahydro-2,2'-dimethyl-[8,8']bi-[[1,3]-dioxolo[4,5*h*]quinolinyl] 8F:** White crystalline solid (0.4 g, 93%); mp 252-254 °C (from EtOAc/hexane); [ $\alpha$ ]<sub>D</sub>+225 (*c* 0.93, CHCl<sub>3</sub>); (Found: C, 73.2; H, 7.75; N, 5.6; C<sub>30</sub>H<sub>40</sub>N<sub>2</sub>O<sub>4</sub> requires C, 73.1; H, 8.2; N, 5.7);  $\delta_H$  (300 MHz, CDCl<sub>3</sub>) 0.86 [18 H, s, 2 x C(CH<sub>3</sub>)<sub>3</sub>], 1.44 (6 H, s, 2 x CH<sub>3</sub>), 1.79 (2 H, m, H-4, H-4'), 2.32 (2 H, m, H-4'', H-4'''), 2.54 (2 H, ddd, *J*<sub>5,4''</sub> 3.7, *J*<sub>5,4</sub> 3.7, *J*<sub>5,5''</sub> 15.5, H-5, H-5'), 3.04 (2 H, ddd, *J*<sub>5'',4</sub> 3.9, *J*<sub>5'',4''</sub> 12.6, *J*<sub>5'',5</sub> 15.5, H-5'', H-5'''), 4.79 (2 H, m, H-3a, H-3a'), 5.28 (2 H, d, *J*<sub>9b,3a</sub> 7.3, H-9b, H-9b'), 7.51 (2 H, d, *J*<sub>6,7</sub> 8.0, H-6, H-6'), 8.35 (2 H, d, *J*<sub>7,6</sub> 8.0, H-7, H-7');  $\delta_c$  (125 MHz, CDCl<sub>3</sub>) 18.38, 24.27, 25.66, 28.26, 38.67, 73.52, 76.30, 113.58, 121.04, 134.21, 137.16, 153.64, 155.20; *m/z* 493 (MH<sup>+</sup>, 100 %).

**Di-(3a*S*,9b*R*,3a'*S*,9b'*R*)-2,2,2'-tetramethyl-3a,4,5,9b,3'a,4',5',9b'-octahydro-[8,8']bi-[[1,3]dioxolo[4,5-*h*]quinolinyl] copper (I) perchlorate 2G:** A mixture of 2,2'-bipyridine 2F (0.1 g, 0.25 mmol) and Cu(MeCN)<sub>4</sub>ClO<sub>4</sub> (0.04 g, 0.125 mmol) was stirred

in MeOH solution (3 cm<sup>3</sup>) for 30 min. The deep red solution, when allowed to evaporate slowly at room temperature, yielded red crystals of Cu(I) complex **2G** (0.10 g, 72 %); mp 256-257 °C (from MeOH); (Found: M<sup>+</sup> 879.3390 C<sub>48</sub>H<sub>56</sub>N<sub>4</sub>O<sub>8</sub>Cu requires 879.3394);  $\lambda_{\text{max}}$ (MeCN)/nm 460 ( $\epsilon$ /dm<sup>3</sup> mol<sup>-1</sup> cm<sup>-1</sup> 32000);  $\delta_{\text{H}}$  (500 MHz; CDCl<sub>3</sub>): 1.72 (2 H, m, H-4, H-4'), 2.01 (2 H, m, H-4", H-4'''), 2.72 (2 H, ddd,  $J_{5,4}$  4.0,  $J_{5,4'}$  4.0,  $J_{5,5''}$  15.2, H-5', H-5'), 2.96 (2 H, ddd,  $J_{5'',4''}$  3.6,  $J_{5'',4''}$  10.5,  $J_{5'',5''}$  15.2, H-5'', H-5'''), 4.35 (2 H, ddd,  $J_{3a,4}$  4.2,  $J_{3a,4''}$  4.2,  $J_{3a,9b}$  6.6, H-3a, H-3'a), 4.77 (2 H, d,  $J_{9b,3a}$  6.6, H-9b, H-9'b), 7.88 (2 H, d,  $J_{6,7}$  8.2, H-6, H-6'), 8.25 (2 H, d,  $J_{7,6}$  8.2, H-7, H-7');  $\delta_{\text{C}}$  (125 MHz; CDCl<sub>3</sub>) 23.74, 24.29, 26.50, 28.12, 73.47, 75.68, 108.13, 120.86, 137.44, 137.76, 150.91, 152.82;  $m/z$  879 (M<sup>+</sup>, 81%), 471 (100), 355 (40).

### Copper (I)-catalysed enantioselective allylic oxidation reaction of alkenes **9** and **11**

The ligand (0.06 mmol) and Cu(OTf)<sub>2</sub> (0.018g, 0.05 mmol) were dissolved in acetone (4 cm<sup>3</sup>) and the yellow solution stirred (1 h) at room temperature under nitrogen atmosphere. Phenylhydrazine (5.9  $\mu$ l, 0.06 mmol) was added to the stirring reaction mixture; the colour of the solution changed to red. After 10 min, the alkene **9** or **11** (5 mmol) was added, at a temperature listed in Table 4.1, followed by dropwise addition of *tert*-butyl peroxybenzoate (0.2 cm<sup>3</sup>, 1.0 mmol). The progress of the reaction was monitored by TLC (10% EtOAc/hexane). When all the oxidant had been consumed (starch and KI solution test), the solvent was removed in *vacuo* and the residue dissolved in CH<sub>2</sub>Cl<sub>2</sub> (15 cm<sup>3</sup>). The solution was washed successively with aqueous NaHCO<sub>3</sub>, brine, water, and then dried (MgSO<sub>4</sub>). Purification of the crude product, obtained after removal of CH<sub>2</sub>Cl<sub>2</sub>, by PLC (10% EtOAc/hexane) gave allylic benzoate **10** or **12**.

**(S)-2-Cyclohexenyl benzoate 10:** Obtained from cyclohexene **9** (0.5cm<sup>3</sup>, 5 mmol) as a colourless liquid (0.18 g, 91%); 90% *ee*, [ $\alpha$ ]<sub>D</sub> -164 (*c* 0.96, CHCl<sub>3</sub>); [lit.<sup>10</sup> 71% *ee*, [ $\alpha$ ]<sub>D</sub> -118 (*c* 0.45, CHCl<sub>3</sub>)];  $\delta_{\text{H}}$  (300 MHz, CDCl<sub>3</sub>) 1.75-1.80 (1 H, m), 1.84-1.99 (3 H, m), 2.05-2.12 (2 H, m), 5.51 (1 H, m), 5.84 (1 H, m), 6.01 (1 H, m), 7.42 (2 H, m, *ArH*), 7.54 (1 H, m, *ArH*), 8.05 (2 H, m, *ArH*). The spectral and analytical data were identical to those reported in literature.<sup>10</sup> The enantiopurity was determined by chiral GC using a Supelco  $\beta$ -Dex 225 chiral column (120 min at 100 °C, then 5 °C/min to 200 °C,  $t_{\text{R}}$ =133.468 min,  $t_{\text{S}}$ =133.127 min).

**(S)-2-Cycloheptenyl benzoate 12:** Obtained from cycloheptene **11** (0.58 ml, 5 mmol) as a colourless liquid (0.19 g, 89%); 97% *ee*, [ $\alpha$ ]<sub>D</sub> -52 (*c* 0.85, CHCl<sub>3</sub>); [lit.<sup>10</sup> 82% *ee*, [ $\alpha$ ]<sub>D</sub> -38 (*c* 1.0, CHCl<sub>3</sub>)];  $\delta_{\text{H}}$  (300 MHz, CDCl<sub>3</sub>) 1.43-1.50 (1 H, m), 1.71-1.90 (3 H, m), 1.97-2.01 (2 H, m), 2.15-2.24 (2 H, m), 5.65 (1 H, m), 5.81-5.90 (2 H, m), 7.44 (2 H, m *ArH*), 7.54 (1 H, m, *ArH*), 8.06 (2 H, m, *ArH*). The other spectral data were also identical to that reported in literature.<sup>10</sup> The enantiopurity was determined by chiral stationary phase GC using a Supelco  $\beta$ -Dex 225 chiral column (210 min at 100 °C, then 5 °C/min to 200 °C,  $t_{\text{R}}$ =225.818 min,  $t_{\text{S}}$ =225.988 min).

### Copper (I)-catalysed enantioselective cyclopropanation reaction of alkenes **13** and **14**:

To a solution of Cu(OTf)<sub>2</sub> (0.009g, 0.025 mmol) in CH<sub>2</sub>Cl<sub>2</sub> (4 cm<sup>3</sup>) was added the ligand (0.03 mmol) and the mixture stirred under nitrogen atmosphere at 20 °C for 1 h. Phenylhydrazine (3  $\mu$ L, 0.03 mmol) and alkene **13** or **14** (4.37 mmol) was added to the reaction mixture. A solution of diazoacetate (2 mmol) in CH<sub>2</sub>Cl<sub>2</sub> (3 cm<sup>3</sup>) was then added, dropwise over a period of 3 h, using a syringe pump. After the addition, the mixture was stirred for an additional 3 h and then concentrated under reduced pressure. The crude product mixture obtained was analysed by <sup>1</sup>H NMR spectroscopy. Chiral stationary phase GC was employed to determine the ratio of *trans* and *cis* isomers and enantiomer composition. Separation of the mixture by PLC (5% EtOAc/hexane) afforded pure

sample of the major *trans*-cyclopropane **15** or **16** and was stereochemically assigned. The corresponding minor *cis*-cyclopropane **17** or **18** was only identified by comparison of its <sup>1</sup>H-NMR spectrum with the literature data.

**(1R,2R)-trans-2-Phenyl-cyclopropane-1-carboxylic acid *t*-butyl ester 15** : Obtained from *t*-butyl diazoacetate (0.27 ml, 2 mmol) and styrene **13** (0.49 cm<sup>3</sup>, 4.37 mmol) as a colourless oil (0.25 g, 58%); 92% *ee*, [ $\alpha$ ]<sub>D</sub> – 225 (*c* 0.98, CHCl<sub>3</sub>); [lit.<sup>11</sup> 92% *ee*, [ $\alpha$ ]<sub>D</sub> – 237 (*c* 0.92, CHCl<sub>3</sub>)];  $\delta$ <sub>H</sub> (300 MHz, CDCl<sub>3</sub>) 1.25 (1 H, m, CHH), 1.47 (9 H, s, C(CH<sub>3</sub>)<sub>3</sub>), 1.50-1.56 (1 H, m, CHH), 1.86 (1 H, m, CHCO<sub>2</sub>Et), 2.48 (1 H, m, CHPh), 7.07-7.13 (2 H, m, ArH), 7.16-7.23 (1 H, m, ArH), 7.24-7.32 (2 H, m, ArH). The <sup>1</sup>H-NMR spectrum of the minor *cis*-cyclopropane **17** was found to be identical to that reported in the literature.<sup>11</sup> The enantiopurity of compound **15** was determined by chiral stationary phase GC, using a Supelco  $\beta$ -Dex 325 chiral column (90 min at 100 °C, then 5 °C/min to 200 °C, hold for 10 min, *t*<sub>R,R</sub>=104.306 min, *t*<sub>S,S</sub>=104.477 min).

**(1R,2R)-trans-2-(4-Fluorophenyl)cyclopropane-1-carboxylic acid *t*-butyl ester 16**: Obtained from *t*-butyl diazoacetate (0.27 cm<sup>3</sup>, 2 mmol) and *p*-fluorostyrene **14** (0.52 cm<sup>3</sup>, 4.37 mmol) as a colourless oil (0.33 g, 71%); 95% *ee*, [ $\alpha$ ]<sub>D</sub> – 180 (*c* 1.04, CHCl<sub>3</sub>); [lit.<sup>11</sup> 99% *ee*, [ $\alpha$ ]<sub>D</sub> – 182 (*c* 0.64, CHCl<sub>3</sub>)];  $\delta$ <sub>H</sub> (300 MHz, CDCl<sub>3</sub>) 1.19 (1 H, m, CHH), 1.47 (9 H, s, *t*-Bu), 1.48-1.53 (1 H, m, CHH), 1.76 (1 H, m, CHCO<sub>2</sub>Et), 2.42 (1 H, m, CHPh), 6.93-6.987 (2 H, m, ArH), 7.02-7.07 (2 H, m, ArH). The NMR data for the minor isomer **18** was found to be identical to that reported in the literature.<sup>11</sup> The enantiopurity of the major isomer **16** was determined by chiral stationary phase GC analysis of its *transesterification* product (ethyl ester, 86% yield) using a Supelco  $\beta$ -Dex 325 chiral column (90 min at 100 °C, then 5 °C/min to 200 °C, hold for 10 min, *t*<sub>R,R</sub>=104.447 min, *t*<sub>S,S</sub>=104.637 min).
